# Supplementary material
Source: publisher figshare collection journal article supplement (https://acs.figshare.com/ndownloader/files/3729133)
Supplement: Supplementary file 1 [file 3729133]

# **Edge-Functionalized Graphene as a Nanofiller:**

## **Molecular Dynamics Simulation Study**

### **SUPPORTING INFORMATION**

Petra Bačová,<sup>\*,†</sup> Anastassia N. Rissanou,<sup>\*,†</sup> and Vagelis Harmandaris<sup>\*,†</sup>

*Institute of Applied and Computational Mathematics (IACM), Foundation for Research and Technology Hellas (FORTH), GR-71110 Heraklion, Crete, Greece, and Department of Mathematics and Applied Mathematics, University of Crete, GR-71409, Heraklion, Crete, Greece*

E-mail: [petra\\_bacova@ehu.es](mailto:petra_bacova@ehu.es); [rissanou@iesl.forth.gr](mailto:rissanou@iesl.forth.gr); [harman@uoc.gr](mailto:harman@uoc.gr)

---

<sup>\*</sup>To whom correspondence should be addressed

<sup>†</sup>Institute of Applied and Computational Mathematics (IACM), Foundation for Research and Technology Hellas (FORTH), GR-71110 Heraklion, Crete, Greece

<sup>‡</sup>Department of Mathematics and Applied Mathematics, University of Crete, GR-71409, Heraklion, Crete, Greece

In the present Supporting Information we show additional figures to the article entitled Edge-Functionalized Graphene as a Nanofiller: Molecular Dynamics Simulation Study. We refer to the graphs in the main text, therefore we provide only basic description of the figures.

## 1 Static properties

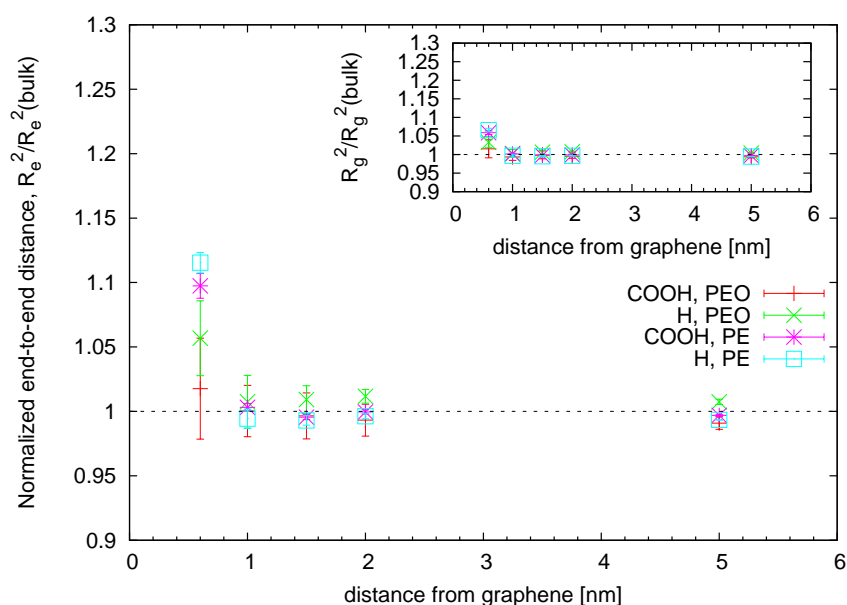

Figure S1: Polymer end-to-end distance as a function of the distance from the edge of the graphene sheet normalized by the same quantity measured in the bulk. Inset: Square radius of gyration divided by the corresponding bulk values for the same set of data.

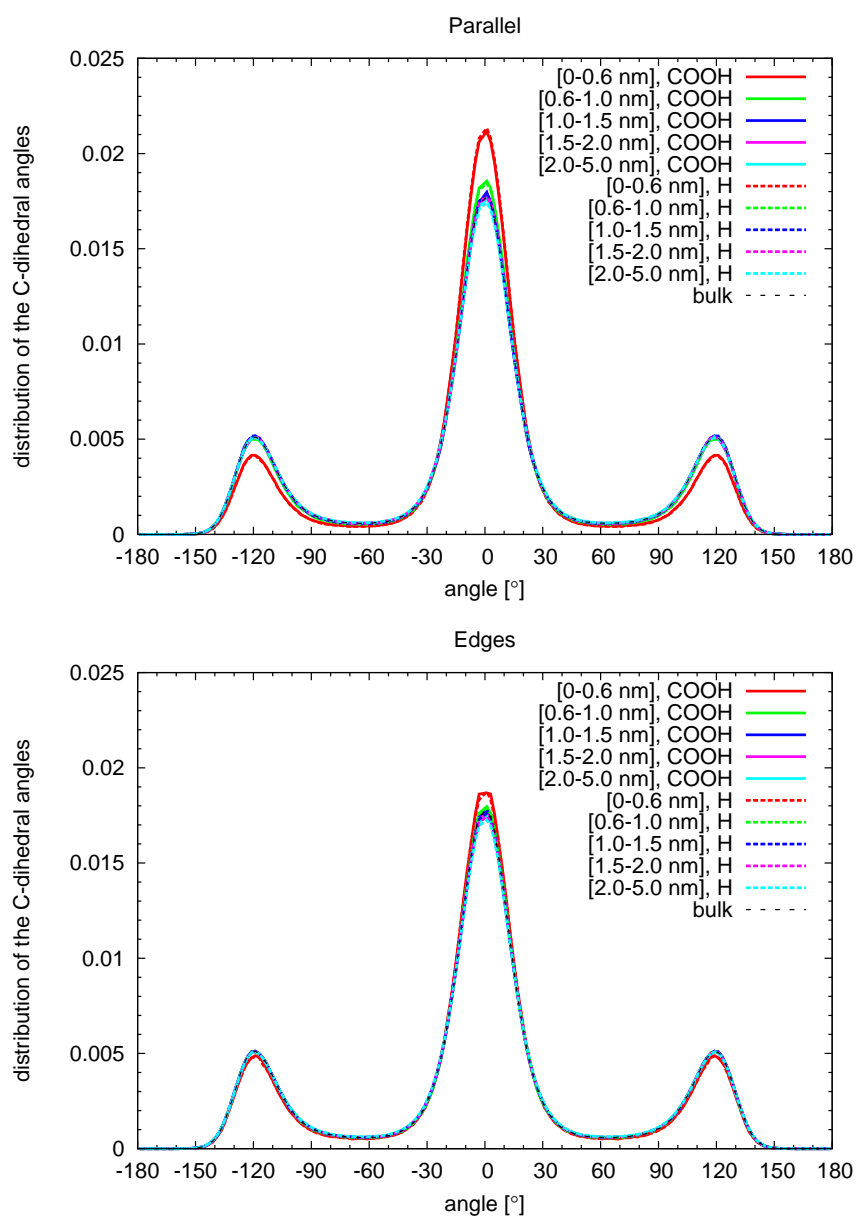

Figure S2: Distributions of the dihedral angles in the graphene/PE nanocomposites. Top: data for the region parallel to the graphene surface. Bottom: data obtained for the edge region. The binning of the layers is specified in the legend.

## 2 Dynamic properties

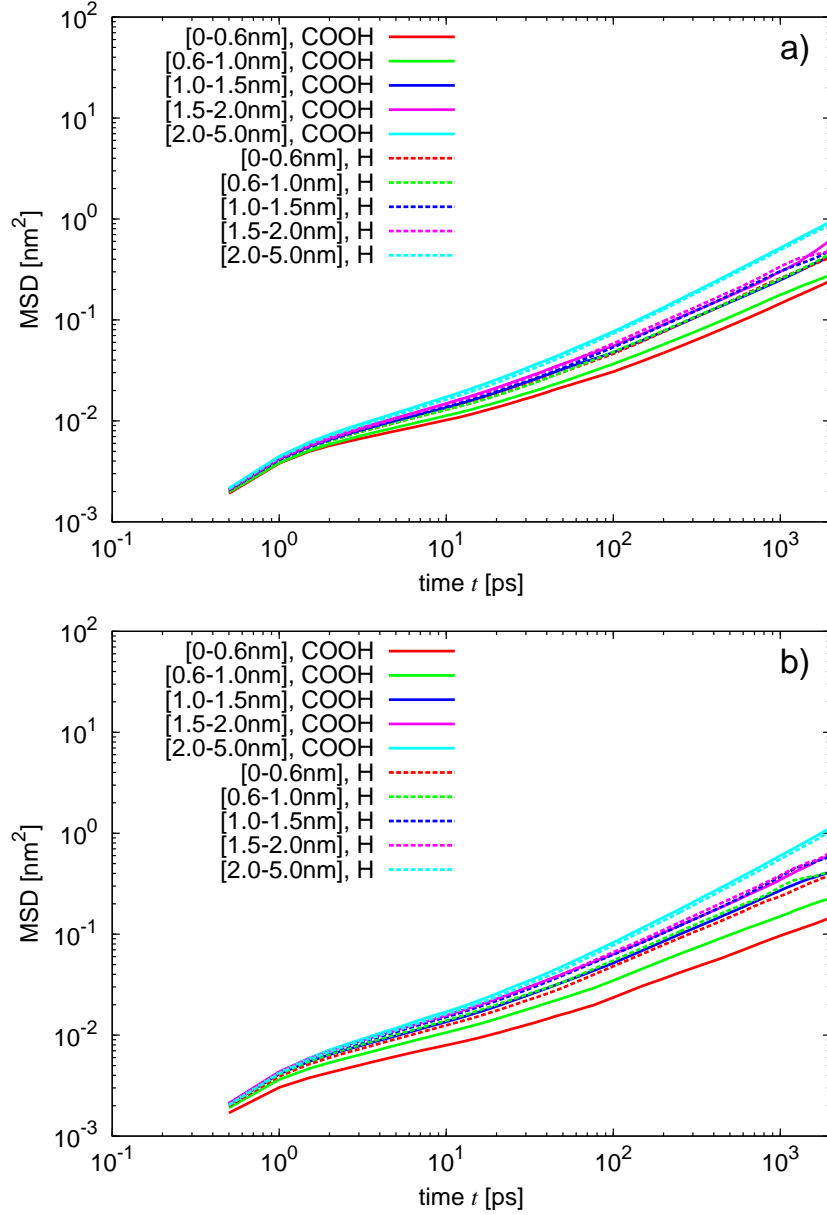

Figure S3: Mean square displacement of the centre of mass of the polymer situated a) in the parallel and b) in the edge region in the graphene/PEO nanocomposites. Only chains whose centres of masses belong to the same layer during the whole time  $t$  are taking into account.

Table S1: Stretching exponent  $\beta_s$  estimated from the correlation function of 1-3 vectors by fitting to KWW function.

|            | $\beta_s(\text{KWW})$ [ps] |                 |                 |                 |                 |                   |                 |                   |
|------------|----------------------------|-----------------|-----------------|-----------------|-----------------|-------------------|-----------------|-------------------|
| system     | COOH PE                    |                 | H PE            |                 | COOH PEO        |                   | H PEO           |                   |
| layer      | parallel                   | edges           | parallel        | edges           | parallel        | edges             | parallel        | edges             |
| 0-1.5 nm   | $0.35 \pm 0.01$            | $0.4 \pm 0.04$  | $0.35 \pm 0.03$ | $0.44 \pm 0.02$ | $0.37 \pm 0.02$ | $0.327 \pm 0.006$ | $0.44 \pm 0.06$ | $0.40 \pm 0.03$   |
| 1.5-3.0 nm | $0.55 \pm 0.03$            | $0.49 \pm 0.01$ | $0.46 \pm 0.02$ | $0.50 \pm 0.03$ | $0.44 \pm 0.01$ | $0.428 \pm 0.007$ | $0.41 \pm 0.03$ | $0.424 \pm 0.008$ |
| 3.0-5.0 nm | $0.48 \pm 0.07$            | $0.56 \pm 0.05$ | $0.48 \pm 0.02$ | $0.6 \pm 0.1$   | $0.43 \pm 0.01$ | $0.46 \pm 0.01$   | $0.43 \pm 0.03$ | $0.451 \pm 0.004$ |

\*bulk values:  $\beta_s(\text{KWW}) = 0.51 \pm 0.02$  ps for PE and  $\beta_s(\text{KWW}) = 0.47 \pm 0.03$  ps for PEO

Table S2: Stretching exponent  $\beta_r$  estimated from the correlation function of end-to-end vectors.

|            | $\beta_r(\text{KWW})$ [ps] |                 |                 |                 |                 |                 |                 |                 |
|------------|----------------------------|-----------------|-----------------|-----------------|-----------------|-----------------|-----------------|-----------------|
| system     | COOH PE                    |                 | H PE            |                 | COOH PEO        |                 | H PEO           |                 |
| layer      | parallel                   | edges           | parallel        | edges           | parallel        | edges           | parallel        | edges           |
| 0-1.5 nm   | $0.8 \pm 0.1$              | $0.9 \pm 0.2$   | $0.64 \pm 0.08$ | $0.9 \pm 0.1$   | $0.7 \pm 0.2$   | $0.54 \pm 0.03$ | $0.7 \pm 0.1$   | $0.8 \pm 0.2$   |
| 1.5-3.0 nm | $0.9 \pm 0.1$              | $0.88 \pm 0.03$ | $1.0 \pm 0.2$   | $0.89 \pm 0.08$ | $0.9 \pm 0.2$   | $0.88 \pm 0.07$ | $0.88 \pm 0.08$ | $0.93 \pm 0.07$ |
| 3.0-5.0 nm | $0.9 \pm 0.1$              | $0.99 \pm 0.04$ | $0.9 \pm 0.1$   | $1.0 \pm 0.03$  | $0.99 \pm 0.06$ | $0.95 \pm 0.02$ | $1.0 \pm 0.2$   | $0.94 \pm 0.02$ |

\*bulk values:  $\beta_r(\text{KWW}) = 0.99 \pm 0.09$  ps for PE and  $\beta_r(\text{KWW}) = 0.9 \pm 0.1$  ps for PEO

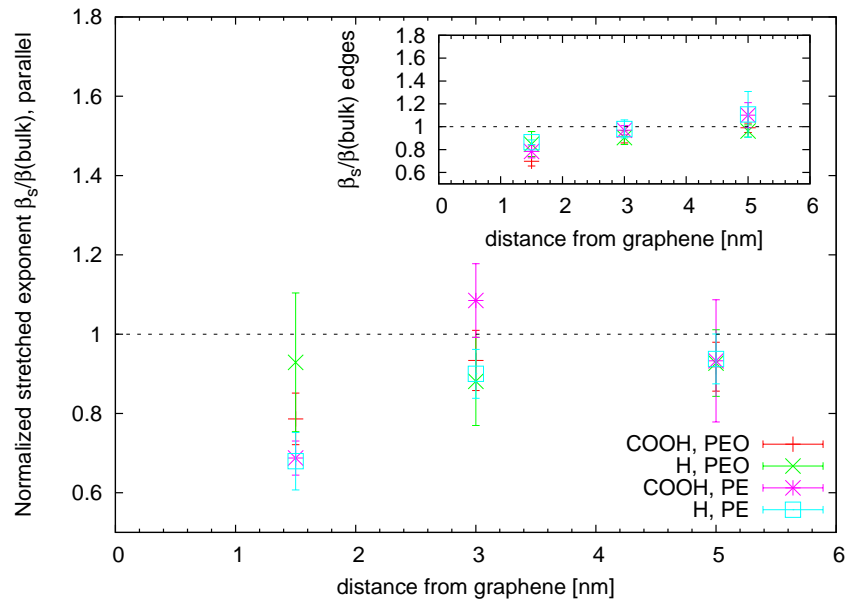

Figure S4: Stretching exponent  $\beta_s$  characteristic for the segmental relaxation in nanocomposites divided by the same observable measured in bulk polymer and plotted as a function of distance from the graphene sheet.

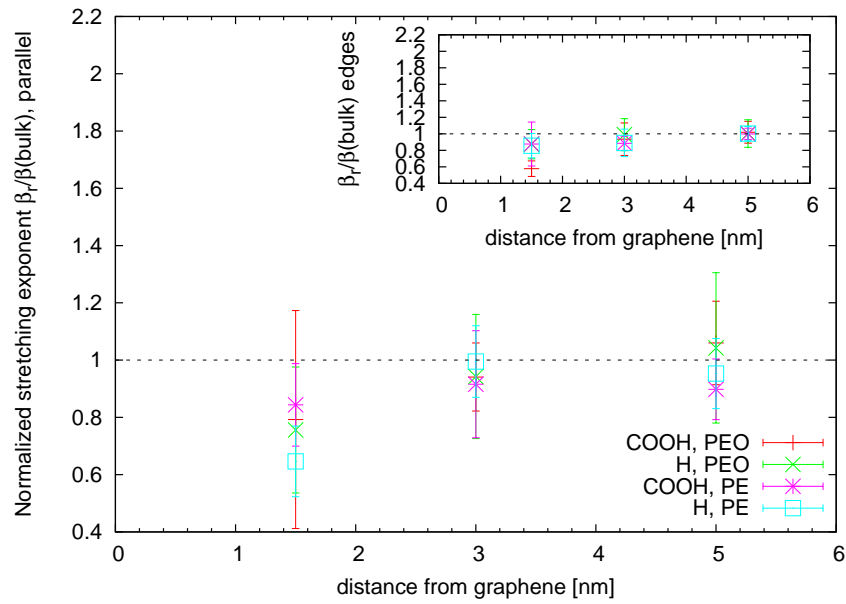

Figure S5: Stretching exponent  $\beta_r$  obtained from the end-to-end relaxation functions of the polymer matrices in nanocomposites normalized by the bulk value.
